# Supplementary material for: Formation of silicate nanoscrolls through solvothermal treatment of layered octosilicate intercalated with organoammonium ions
Source: Royal Society of Chemistry journal article supplement (doi:10.1039/c9nr01651a), 2019-01-01
Supplement: c9nr01651a1.pdf [file c9nr01651a1.pdf]

## Electronic Supplementary Information

### Formation of silicate nanoscrolls through solvothermal treatment of layered octosilicate intercalated with organoammonium ions

Yusuke Asakura,<sup>[a]</sup> Megumi Sugihara,<sup>[b]</sup> Takeru Hirohashi,<sup>[b]</sup> Aya Torimoto,<sup>[b]</sup> Takuya  
Matsumoto,<sup>[b]</sup> Masakazu Koike,<sup>[b]</sup> Yoshiyuki Kuroda,<sup>[c]</sup> Hiroaki Wada,<sup>[b]</sup> Atsushi  
Shimojima,<sup>[b]</sup> and Kazuyuki Kuroda\*<sup>[b, d]</sup>

<sup>[a]</sup>*Institute of Multidisciplinary Research for Advanced Materials, Tohoku University, 2-1-1 Katahira, Aoba-ku, Sendai, 980-8577 (Japan)*

<sup>[b]</sup>*Department of Applied Chemistry, Faculty of Science and Engineering, Waseda University, 3-4-1 Ohkubo, Shinjuku-ku, Tokyo, 169-8555 (Japan)*

<sup>[c]</sup>*Green Hydrogen Research Center, Yokohama National University, 79-5 Tokiwadai, Hodogaya-ku, Yokohama 240-8501 (Japan)*

<sup>[d]</sup>*Kagami Memorial Research Institute for Materials Science and Technology, Waseda University, 2-8-26 Nishiwaseda, Shinjuku-ku, Tokyo, 169-0051 (Japan)*

## Contents

|                                                                                                                                                                                                                                                                                 |    |
|---------------------------------------------------------------------------------------------------------------------------------------------------------------------------------------------------------------------------------------------------------------------------------|----|
| <b>Crystallographic data of Layered Octosilicate</b> .....                                                                                                                                                                                                                      | 3  |
| <b>Equation for the calculation of sheet size forming one nanoscroll</b> .....                                                                                                                                                                                                  | 4  |
| <b>Table S1.</b> Elemental analysis data.....                                                                                                                                                                                                                                   | 5  |
| <b>Fig. S1</b> <sup>29</sup> Si MAS NMR spectra of (a) Na-Oct, (b) (C <sub>18</sub> ) <sub>2</sub> DMA-Oct, and (c) solvo-(C <sub>18</sub> ) <sub>2</sub> DMA-Oct. ....                                                                                                         | 6  |
| <b>Fig. S2</b> SEM image of another view of (C <sub>18</sub> ) <sub>2</sub> DMA-Oct. ....                                                                                                                                                                                       | 7  |
| <b>Fig. S3</b> SEM image of another view of solvo-(C <sub>18</sub> ) <sub>2</sub> DMA-Oct. ....                                                                                                                                                                                 | 8  |
| <b>Fig. S4</b> (a) TEM image of layered octosilicate and (b) ED pattern of the selected circular area, shown by the white dots in the image (a). ....                                                                                                                           | 9  |
| <b>Fig. S5</b> SEM image of another view of solvo-(C <sub>18</sub> ) <sub>2</sub> DMA-Oct. ....                                                                                                                                                                                 | 10 |
| <b>Fig. S6</b> EDX spectra of (a) (C <sub>18</sub> ) <sub>2</sub> DMA-Oct and (b) solvo-(C <sub>18</sub> ) <sub>2</sub> DMA-Oct.....                                                                                                                                            | 11 |
| <b>Fig. S7</b> SEM image of (C <sub>18</sub> ) <sub>2</sub> DMA-Oct heated at 70 °C for 1 d in a Teflon-sealed autoclave.....                                                                                                                                                   | 12 |
| <b>Fig. S8</b> SEM images of (a) (C <sub>18</sub> ) <sub>2</sub> DMA-Oct heated at 70 °C for 1 d in heptane under stirring with a refluxing condenser and (b) (C <sub>18</sub> ) <sub>2</sub> DMA-Oct treated solvothermally at 120 °C for 1 d in heptane without stirring..... | 13 |

## Crystallographic data of Layered Octosilicate

The following data were obtained from the literature.<sup>1</sup>

| Unit cell    |                                                           |
|--------------|-----------------------------------------------------------|
| Space group  | $I4_1/amd$                                                |
| $a$          | 7.3276 Å                                                  |
| $c$          | 44.319 Å                                                  |
| cell content | Na[Si <sub>4</sub> O <sub>8</sub> (OH)]·4H <sub>2</sub> O |

| Fractional Coordinates |                |          |          |          |          |
|------------------------|----------------|----------|----------|----------|----------|
| atom                   | Wyckoff letter | $x$      | $y$      | $z$      | $B_{eq}$ |
| Si1                    | 16g            | 0.289(1) | 0.039(1) | 1/8      | 1.5      |
| Si2                    | 16h            | 0        | 0.544(1) | 0.074(1) | 1.5      |
| O1                     | 32i            | 0.171(1) | 0.987(1) | 0.096(1) | 3.1      |
| O2                     | 16h            | 0.253(1) | 1/4      | 0.134(1) | 3.1      |
| O3                     | 8e             | 0        | 3/4      | 0.062(1) | 3.1      |
| O4                     | 16h            | 0        | 0.093(1) | 0.045(1) | 3.5      |
| Na                     | 8e             | 1/2      | 1/4      | 0.002(1) | 6.0      |
| O5 (H <sub>2</sub> O)  | 16f            | 0.254(1) | 1/2      | 0        | 4.0      |
| O6 (H <sub>2</sub> O)  | 8e             | 1/2      | 3/4      | 0.053(1) | 4.0      |
| O7 (H <sub>2</sub> O)  | 8e             | 1/2      | 1/4      | 0.051(1) | 4.0      |

1. S. Vortmann *et al.*, *J. Phys. Chem. B*, **101**, 1292 (1997)

### Equation for the calculation of sheet size forming one nanoscroll

$$D_n = D + d \times (n - 1) \times 2 \quad (1)$$

$$L = \sum_{n=1}^{13} \pi D_n \quad (2)$$

$D$  [nm]: inner diameter of a nanoscroll

$n$ : the number of the layer stacking

(the number of layer stacking of one typical nanoscroll is 13)

$D_n$  [nm]: diameter of  $n$ -th layer of hypothesized multiwall nanotube

$d$  [nm]: distance between the stacking layers in a wall

$L$  [nm]: sheet size forming one nanoscroll

**Table S1.** Elemental analysis data.

|                                               | C<br>/ wt% <sup>a</sup> | H<br>/ wt% <sup>a</sup> | N<br>/ wt% <sup>a</sup> | SiO <sub>2</sub><br>/ wt% <sup>b</sup> | Na<br>/ wt% <sup>c</sup> | C/N  | N/Si | Na/Si | Br/Si <sup>d</sup> |
|-----------------------------------------------|-------------------------|-------------------------|-------------------------|----------------------------------------|--------------------------|------|------|-------|--------------------|
| Na-Oct                                        | -                       | -                       | -                       | 29.5                                   | 5.1                      | -    | -    | 0.21  | -                  |
| (C <sub>18</sub> ) <sub>2</sub> DMA-Oct       | 54.1                    | 10.5                    | 1.7                     | 31.3                                   | 0.067                    | 37.8 | 0.23 | 0.007 | 0.07               |
| solvo_(C <sub>18</sub> ) <sub>2</sub> DMA-Oct | 49.2                    | 9.3                     | 1.6                     | 38.9                                   | -                        | 36.8 | 0.17 | -     | 0.03               |

<sup>a</sup>The values were collected by CHN analysis.

<sup>b</sup>A residual amount after thermogravimetry up to 900 °C is regarded as the amount of silica in the samples.

<sup>c</sup>The values were collected by ICP analysis.

<sup>d</sup>The values were determined by EDX analysis.

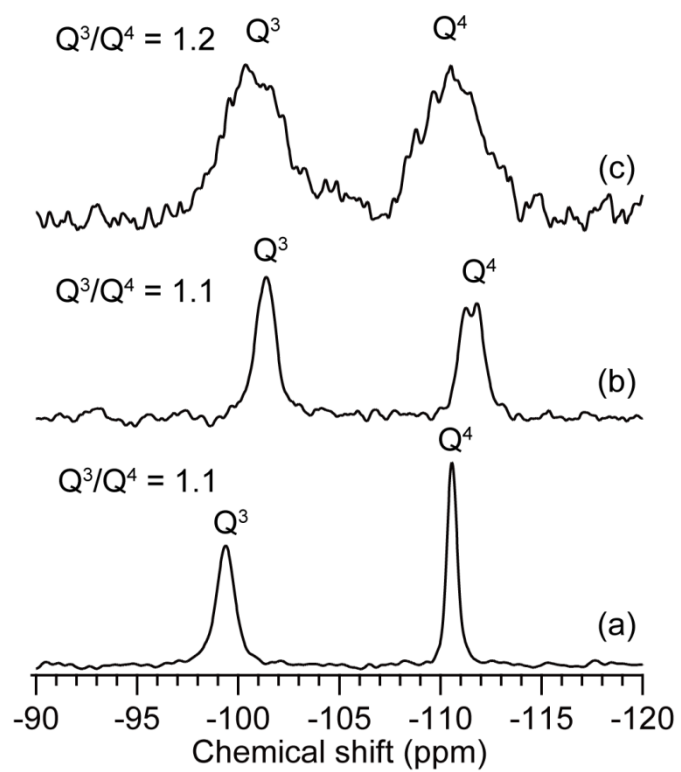

**Fig. S1**  $^{29}\text{Si}$  MAS NMR spectra of (a) Na-Oct, (b)  $(\text{C}_{18})_2\text{DMA-Oct}$ , and (c) solvo- $(\text{C}_{18})_2\text{DMA-Oct}$ .

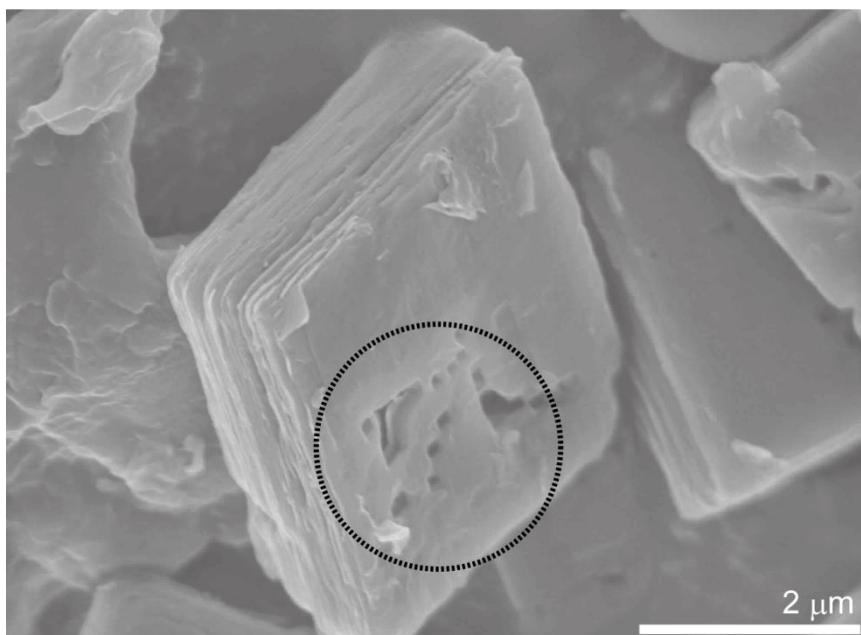

**Fig. S2** SEM image of another view of (C<sub>18</sub>)<sub>2</sub>DMA-Oct. The circle shows defective sites.

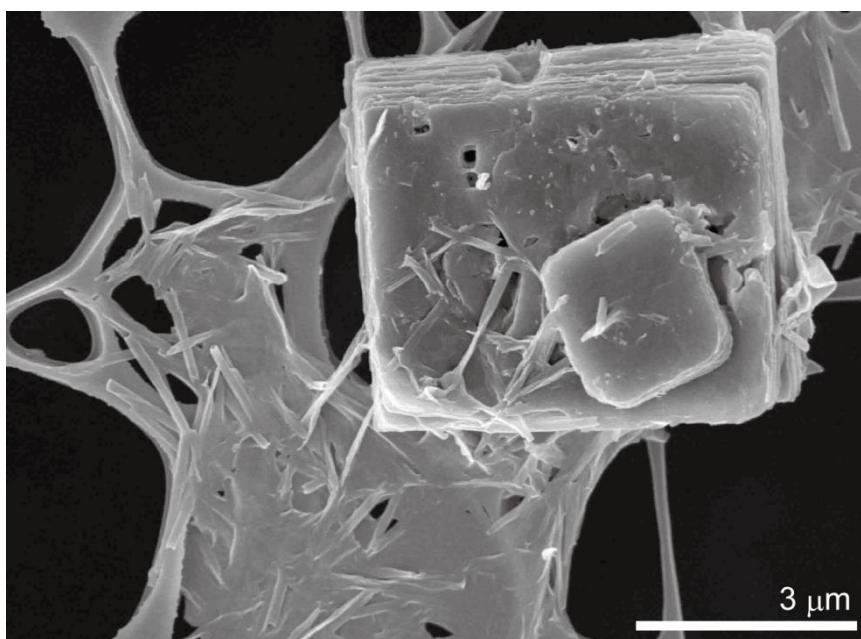

**Fig. S3** SEM image of another view of solvo-(C<sub>18</sub>)<sub>2</sub>DMA-Oct.



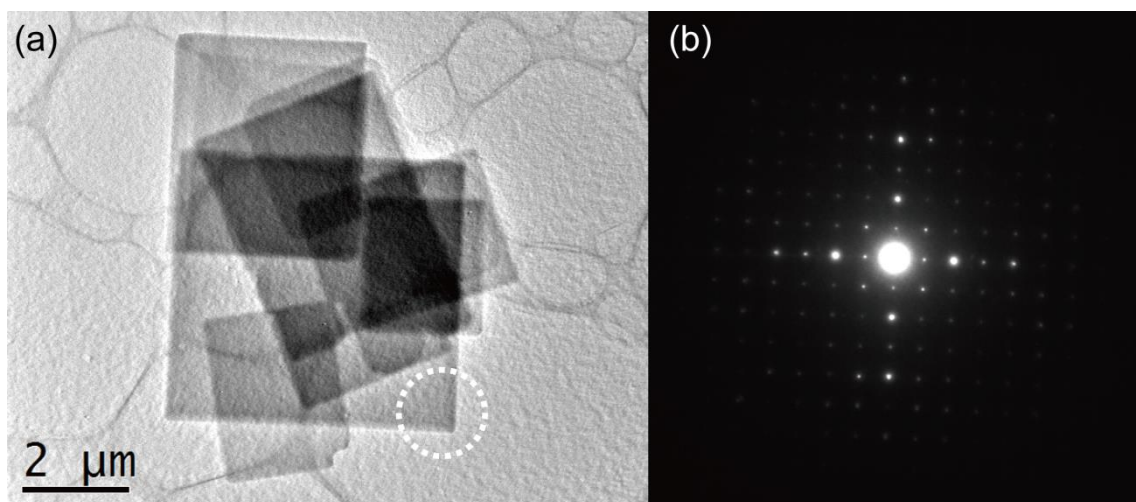

**Fig. S4** (a) TEM image of layered octosilicate and (b) ED pattern of the selected circular area, shown by the white dots in the image (a).

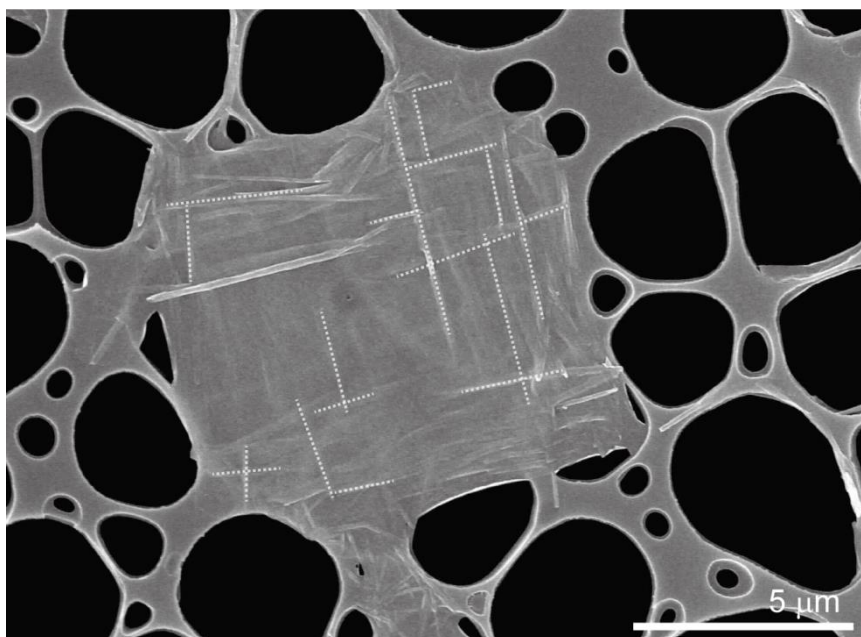

**Fig. S5** SEM image of another view of solvo-(C<sub>18</sub>)<sub>2</sub>DMA-Oct. (The lines shown by the white dots indicate the direction of nanoscrolls.)

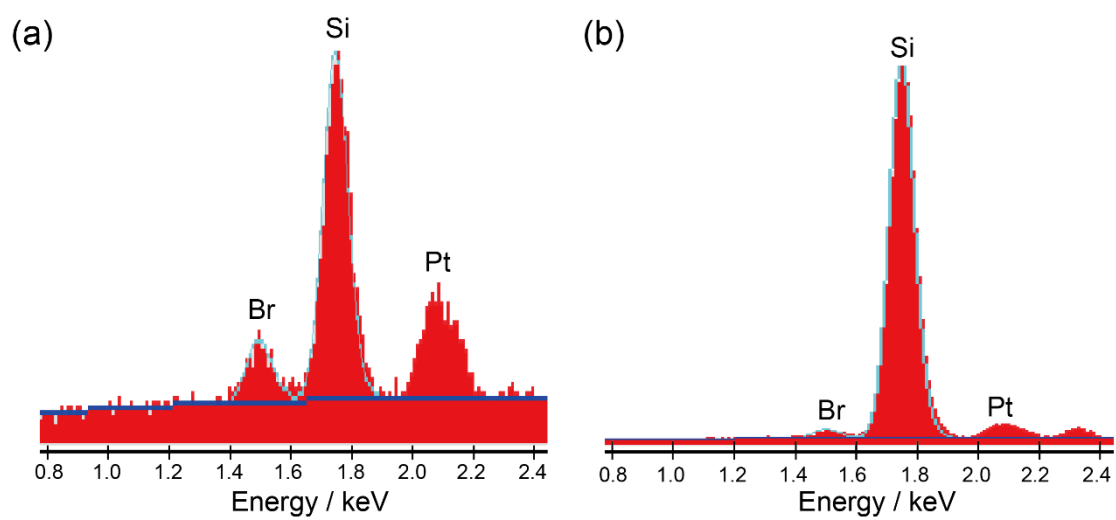

**Fig. S6** EDX spectra of (a)  $(C_{18})_2DMA-Oct$  and (b)  $solvo-(C_{18})_2DMA-Oct$ . Pt and Pd (not shown) were added by sputtering onto the samples to avoid charge-up.

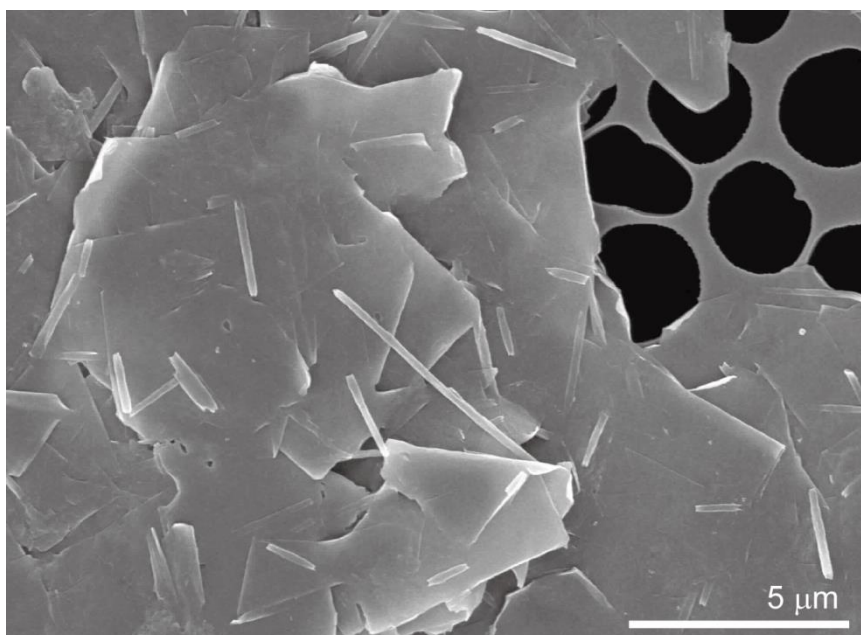

**Fig. S7** SEM image of  $(C_{18})_2DMA-Oct$  heated at 70 °C for 1 d in a Teflon-sealed autoclave.

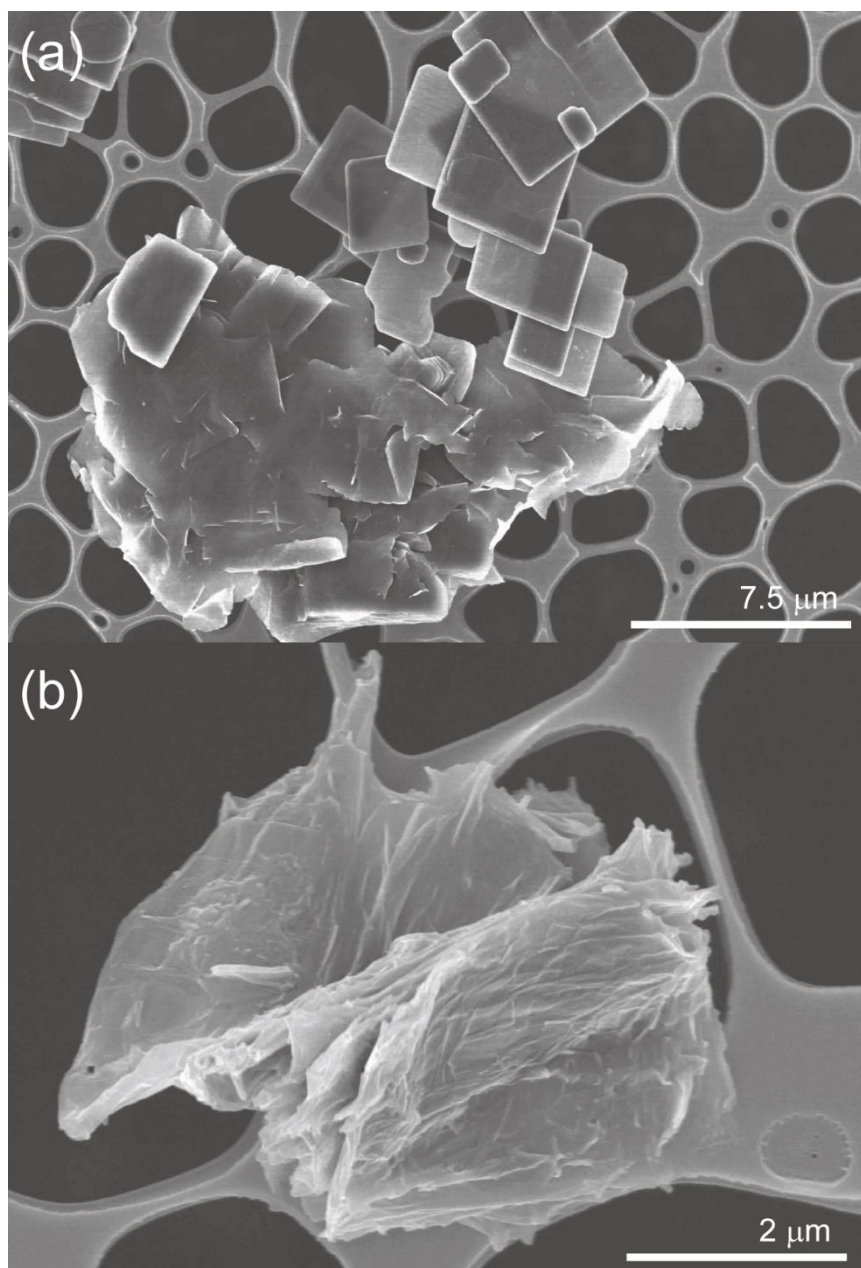

**Fig. S8** SEM images of (a)  $(C_{18})_2DMA-Oct$  heated at 70 °C for 1 d in heptane under stirring with a refluxing condenser and (b)  $(C_{18})_2DMA-Oct$  treated solvothermally at 120 °C for 1 d in heptane without stirring.
